# Supplementary material for: Strong Negative Association between Cesarean Delivery and Early Initiation of Breastfeeding Practices among Vietnamese Mothers—A Secondary Analysis of the Viet Nam Sustainable Development Goal Indicators on Children and Women Survey
Source: MDPI journal article supplement (doi:10.3390/nu15214501), 2023-10-24
Supplement: s1 [file s1]

**Table S1:** Socio-demographic characteristics of mothers who practiced early initiation of breastfeeding in the vaginal-delivery group.

| Variables                                              | EIBF <sup>#</sup><br>n (%) | No EIBF <sup>#</sup><br>n (%) | Total<br>n=1,075(%) | p-value |
|--------------------------------------------------------|----------------------------|-------------------------------|---------------------|---------|
| Age (years)                                            |                            |                               |                     | 0.023*  |
| 15-17                                                  | 6 (14.6)                   | 35 (85.4)                     | 41 (3.8)            |         |
| 18-29                                                  | 200 (30.6)                 | 454 (69.4)                    | 654 (60.8)          |         |
| 30-39                                                  | 124 (35.6)                 | 224 (64.4)                    | 348 (32.4)          |         |
| 40-49                                                  | 13 (40.6)                  | 19 (59.4)                     | 32 (3.0)            |         |
| Ethnicity of household head                            |                            |                               |                     | 0.743** |
| Kinh/Chinese                                           | 158 (32.4)                 | 329 (67.6)                    | 487 (45.3)          |         |
| Others <sup>a</sup>                                    | 185 (31.5)                 | 403 (68.5)                    | 588 (54.7)          |         |
| Residential regions                                    |                            |                               |                     | 0.171*  |
| Northern Midland, Mountain and Central Highlands areas | 177 (34.4)                 | 337 (65.6)                    | 514 (47.8)          |         |
| Red River and Mekong River Delta areas                 | 76 (27.0)                  | 206 (73.0)                    | 282 (26.2)          |         |
| North Central and Central Coastal areas                | 44 (30.8)                  | 99 (69.2)                     | 143 (13.3)          |         |
| Southeast areas                                        | 46 (33.8)                  | 90 (66.2)                     | 136 (12.7)          |         |
| Living areas                                           |                            |                               |                     | 0.294** |
| Urban                                                  | 78 (35.0)                  | 145 (65.0)                    | 223 (20.7)          |         |
| Rural                                                  | 265 (31.1)                 | 587 (68.9)                    | 852 (79.3)          |         |
| Level of education                                     |                            |                               |                     | 0.473*  |
| None/pre-primary                                       | 51 (33.3)                  | 102 (66.7)                    | 153 (14.2)          |         |
| Primary school                                         | 44 (31.7)                  | 95 (68.3)                     | 139 (12.9)          |         |
| Junior and senior high school                          | 170 (30.1)                 | 395 (69.9)                    | 565 (52.6)          |         |
| Higher education <sup>b</sup>                          | 78 (35.8)                  | 140 (64.2)                    | 218 (20.3)          |         |
| Wealth index                                           |                            |                               |                     | 0.895*  |
| Poorest/poor                                           | 227 (32.0)                 | 482 (68.0)                    | 709 (66.0)          |         |
| Middle                                                 | 47 (33.1)                  | 95 (66.9)                     | 142 (13.2)          |         |
| Rich/richest                                           | 69 (30.8)                  | 155 (69.2)                    | 224 (20.8)          |         |
| Marital status                                         |                            |                               |                     | 0.697** |
| Married/in a union                                     | 332 (31.8)                 | 712 (68.2)                    | 1044 (97.1)         |         |
| Not in union <sup>c</sup>                              | 11 (35.5)                  | 20 (64.5)                     | 31 (2.9)            |         |
| Partner's age <sup>d</sup> (years old)                 |                            |                               |                     | 0.125** |
| < 31                                                   | 170 (29.8)                 | 401 (70.2)                    | 571 (54.7)          |         |
| ≥ 31                                                   | 162 (34.2)                 | 311 (65.8)                    | 473 (45.3)          |         |
| Age at the time of the first delivery (years)          |                            |                               |                     | 0.076*  |
| < 18                                                   | 46 (24.9)                  | 139 (75.1)                    | 185 (17.2)          |         |
| 18-29                                                  | 280 (33.3)                 | 561 (66.7)                    | 841 (78.2)          |         |
| ≥ 30                                                   | 17 (34.7)                  | 32 (65.3)                     | 49 (4.6)            |         |
| Parity                                                 |                            |                               |                     | 0.946*  |
| 1                                                      | 103 (31.2)                 | 227 (68.8)                    | 330 (30.7)          |         |
| 2-3                                                    | 202 (32.3)                 | 424 (67.7)                    | 626 (58.2)          |         |
| ≥ 4                                                    | 38 (31.9)                  | 81 (68.1)                     | 119 (11.1)          |         |
| Intended pregnancy for the last child                  |                            |                               |                     | 0.132** |
| Yes                                                    | 278 (33.1)                 | 563 (66.9)                    | 841 (78.2)          |         |
| No                                                     | 65 (27.8)                  | 169 (72.2)                    | 234 (21.8)          |         |
| Total                                                  | 343 (31.9)                 | 732 (68.1)                    | 1075 (100.0)        |         |

\*Chi-square test \*\*Fisher's exact test

<sup>#</sup> Early initiation of breastfeeding.

<sup>a</sup> Others included minor ethnicities such as Tay, Thai, Muong, Nung, Khmer, and Mong.

<sup>b</sup> Higher education: Women who graduated from vocational school, college, university, or had a postgraduate degree.

<sup>c</sup> Women were single, separated, divorced, or widowed.

<sup>d</sup> Partner's age was divided by the median.

**Table S2:** Characteristics of antenatal care and delivery of mothers who practiced early initiation of breastfeeding in the vaginal-delivery group.

| Variables                                                                                | EIBF <sup>#</sup><br>n (%) | No EIBF <sup>#</sup><br>n (%) | Total<br>n=1,075 | p-value |
|------------------------------------------------------------------------------------------|----------------------------|-------------------------------|------------------|---------|
| Gestational week at the time of the first ANC <sup>a</sup> of the last pregnancy (weeks) |                            |                               |                  | 0.753*  |
| ≥13                                                                                      | 6 (40.0)                   | 9 (60.0)                      | 15 (1.4)         |         |
| 1-12                                                                                     | 302 (32.0)                 | 643 (68.0)                    | 945 (87.9)       |         |
| None                                                                                     | 35 (30.4)                  | 80 (69.6)                     | 115 (10.7)       |         |
| Number of ANC visits during the last pregnancy (times)                                   |                            |                               |                  | 0.513*  |
| 1-3                                                                                      | 76 (30.9)                  | 170 (69.1)                    | 246 (22.9)       |         |
| 4-7                                                                                      | 106 (30.0)                 | 247 (70.0)                    | 353 (32.8)       |         |
| ≥ 8                                                                                      | 126 (34.9)                 | 235 (65.1)                    | 361 (33.6)       |         |
| None                                                                                     | 35 (30.4)                  | 80 (69.6)                     | 115 (10.7)       |         |
| ANC provider during the last pregnancy                                                   |                            |                               |                  | 0.030*  |
| Doctor                                                                                   | 281 (31.5)                 | 612 (68.5)                    | 893 (83.1)       |         |
| Nurse/midwife                                                                            | 14 (30.4)                  | 32 (69.6)                     | 46 (4.3)         |         |
| Community health worker                                                                  | 13 (61.9)                  | 8 (38.1)                      | 21 (2.0)         |         |
| None                                                                                     | 35 (30.4)                  | 80 (69.6)                     | 115 (10.7)       |         |
| Place of the delivery of the last child                                                  |                            |                               |                  | 0.984*  |
| Public hospital                                                                          | 218 (31.6)                 | 471 (68.4)                    | 689 (64.1)       |         |
| Other public sectors <sup>b</sup>                                                        | 43 (33.3)                  | 86 (66.7)                     | 129 (12.0)       |         |
| Private medical sectors <sup>c</sup>                                                     | 15 (32.6)                  | 31 (67.4)                     | 46 (4.3)         |         |
| Home/other                                                                               | 67 (31.8)                  | 144 (68.2)                    | 211 (19.6)       |         |
| Delivery mode of the last child                                                          |                            |                               |                  |         |
| Vaginal delivery                                                                         | 343 (31.9)                 | 732 (68.1)                    | 1075 (100.0)     |         |
| Cesarean section                                                                         | -                          | -                             | -                |         |
| Delivery assistants for the last child                                                   |                            |                               |                  | 0.480*  |
| Doctor                                                                                   | 252 (31.6)                 | 545 (68.4)                    | 797 (74.1)       |         |
| Nurse/midwife only                                                                       | 21 (30.9)                  | 47 (69.1)                     | 68 (6.3)         |         |
| Community health worker                                                                  | 8 (50.0)                   | 8 (50.0)                      | 16 (1.5)         |         |
| No medical support                                                                       | 62 (32.0)                  | 132 (68.0)                    | 194 (18.0)       |         |
| Skin-to-skin contact immediately after the last delivery                                 |                            |                               |                  | 0.108** |
| Yes                                                                                      | 243 (33.6)                 | 481 (66.4)                    | 724 (67.3)       |         |
| No                                                                                       | 100 (28.5)                 | 251 (71.5)                    | 351 (32.7)       |         |
| Sex of the last child                                                                    |                            |                               |                  | 0.169** |
| Male                                                                                     | 185 (33.9)                 | 361 (66.1)                    | 546 (50.8)       |         |
| Female                                                                                   | 158 (29.9)                 | 371 (70.1)                    | 529 (49.2)       |         |
| Birth weight of the last child (g)                                                       |                            |                               |                  | 0.281*  |
| < 2,500                                                                                  | 8 (22.2)                   | 28 (77.8)                     | 36 (4.1)         |         |
| 2,500-3,999                                                                              | 262 (32.2)                 | 552 (67.8)                    | 814 (92.8)       |         |
| ≥4,000                                                                                   | 11 (40.7)                  | 16 (59.3)                     | 27 (3.1)         |         |
| Total                                                                                    | 343 (31.9)                 | 732 (68.1)                    | 1075 (100.0)     |         |

\*Chi-square test    \*\*Fisher's exact test

<sup>#</sup> Early initiation of breastfeeding.

<sup>a</sup> ANC: Antenatal care

<sup>b</sup> Other public sectors referred to local clinics, commune health centers, hospitals of a ministry or sector, and other public institutions.

<sup>c</sup>Private medical sectors were private hospitals or other private medical institutions.

**Table S3:** Univariate and multivariate analyses of early initiation of breastfeeding among the vaginal-delivery group of Vietnamese mothers.

| Variables                                                                                | OR (CI 95%)       | Adjusted-OR (CI 95%) |
|------------------------------------------------------------------------------------------|-------------------|----------------------|
| Age (years)                                                                              |                   |                      |
| 15-17                                                                                    | 0.39 (0.16-0.94)* | 0.14 (0.02-0.81)*    |
| 18-29                                                                                    | 1 (reference)     | 1 (reference)        |
| 30-39                                                                                    | 1.26 (0.95-1.66)  | 1.11 (0.71-1.75)     |
| 40-49                                                                                    | 1.55 (0.75-3.21)  | 1.54 (0.58-4.10)     |
| Ethnicity of household head                                                              |                   |                      |
| Kinh/Chinese                                                                             | 1 (reference)     | 1 (reference)        |
| Others <sup>a</sup>                                                                      | 0.96 (0.74-1.24)  | 0.87 (0.57-1.33)     |
| Residential regions                                                                      |                   |                      |
| Northern Midland, Mountain and Central Highlands areas                                   | 1 (reference)     | 1 (reference)        |
| Red River and Mekong River Delta areas                                                   | 0.70 (0.51-0.97)* | 0.59 (0.38-0.91)*    |
| North Central and Central Coastal areas                                                  | 1.21 (0.77-1.87)  | 0.75 (0.45-1.23)     |
| Southeast areas                                                                          | 1.39 (0.89-2.16)  | 0.67 (0.39-1.17)     |
| Living areas                                                                             |                   |                      |
| Urban                                                                                    | 1 (reference)     | 1 (reference)        |
| Rural                                                                                    | 0.84 (0.62-1.15)  | 0.87 (0.58-1.31)     |
| Level of education                                                                       |                   |                      |
| None/pre-primary                                                                         | 1 (reference)     | 1 (reference)        |
| Primary school                                                                           | 0.93 (0.57-1.51)  | 0.70 (0.32-1.54)     |
| Junior and senior high school                                                            | 0.86 (0.59-1.26)  | 0.54 (0.26-1.14)     |
| Higher education <sup>b</sup>                                                            | 1.11 (0.72-1.72)  | 0.70 (0.30-1.60)     |
| Family wealth index                                                                      |                   |                      |
| Poor/poorest                                                                             | 0.95 (0.65-1.40)  | 1.04 (0.64-1.70)     |
| Middle                                                                                   | 1 (reference)     | 1 (reference)        |
| Rich/richest                                                                             | 0.90 (0.57-1.41)  | 0.79 (0.48-1.29)     |
| Partner's age <sup>c</sup> (years old)                                                   |                   |                      |
| < 31                                                                                     | 1 (reference)     | 1 (reference)        |
| ≥ 31                                                                                     | 1.23 (0.95-1.60)  | 1.30 (0.85-1.99)     |
| Age at the time of the first delivery (years)                                            |                   |                      |
| < 18                                                                                     | 0.66 (0.46-0.95)* | 0.81 (0.46-1.41)     |
| 18-29                                                                                    | 1 (reference)     | 1 (reference)        |
| ≥ 30                                                                                     | 1.06 (0.58-1.95)  | 0.63 (0.30-1.35)     |
| Parity                                                                                   |                   |                      |
| 1                                                                                        | 1 (reference)     | 1 (reference)        |
| 2-3                                                                                      | 1.05 (0.79-1.40)  | 0.69 (0.46-1.02)     |
| ≥ 4                                                                                      | 1.03 (0.66-1.62)  | 0.64 (0.28-1.44)     |
| Intended pregnancy for the last child                                                    |                   |                      |
| No                                                                                       | 1 (reference)     | 1 (reference)        |
| Yes                                                                                      | 1.28 (0.93-1.77)  | 1.21 (0.82-1.80)     |
| Gestational week at the time of the first ANC <sup>d</sup> of the last pregnancy (weeks) |                   |                      |

|                                                          |                    |                       |
|----------------------------------------------------------|--------------------|-----------------------|
| ≥ 13                                                     | 1.42 (0.50-4.02)   | 1.47 (0.45-4.77)      |
| 1-12                                                     | 1 (reference)      | 1 (reference)         |
| None                                                     | 0.93 (0.61-1.42)   | 1.47 (0.51-4.26)      |
| Number of ANC visits during the last pregnancy (weeks)   |                    |                       |
| 1-3                                                      | 0.83 (0.59-1.18)   | 0.76 (0.43-1.35)      |
| 4-7                                                      | 0.80 (0.59-1.10)   | 0.80 (0.55-1.16)      |
| ≥ 8                                                      | 1 (reference)      | 1 (reference)         |
| None                                                     | 0.82 (0.52-1.28)   | -                     |
| ANC provider during the last pregnancy                   |                    |                       |
| Doctor                                                   | 1 (reference)      | 1 (reference)         |
| Nurse/midwife                                            | 0.95 (0.50-1.81)   | 1.41 (0.62-3.23)      |
| Community health worker                                  | 3.54 (1.45-8.64)** | 31.16 (2.97-327.52)** |
| None                                                     | 0.95 (0.63-1.45)   | -                     |
| Place of delivery of the last child                      |                    |                       |
| Public hospital                                          | 1 (reference)      | 1 (reference)         |
| Other public sectors <sup>e</sup>                        | 1.08 (0.72-1.61)   | 1.15 (0.72-1.85)      |
| Private medical sectors <sup>§</sup>                     | 1.05 (0.55-1.98)   | 0.98 (0.50-1.92)      |
| Home/other                                               | 1.01 (0.72-1.40)   | 0.96 (0.176-5.21)     |
| Delivery assistant for the last child                    |                    |                       |
| Doctor                                                   | 1 (reference)      | 1 (reference)         |
| Nurse/midwife only                                       | 0.97 (0.57-1.65)   | 0.97 (0.52-1.81)      |
| Community health worker                                  | 2.16 (0.80-5.83)   | 0.74 (0.90-6.10)      |
| No medical support                                       | 1.12 (0.73-1.42)   | 0.87 (0.28-12.53)     |
| Skin-to-skin contact immediately after the last delivery |                    |                       |
| Yes                                                      | 1 (reference)      | 1 (reference)         |
| No                                                       | 0.79 (0.60-1.04)   | 0.58 (0.37-0.93)*     |
| Sex of the last child                                    |                    |                       |
| Male                                                     | 1 (reference)      | 1 (reference)         |
| Female                                                   | 0.83 (0.64-1.08)   | 0.92 (0.68-1.25)      |
| Birth weight of the last child (g)                       |                    |                       |
| ≤2,499                                                   | 0.60 (0.27-1.34)   | 0.57 (0.24-1.32)      |
| 2,500-3,999                                              | 1 (reference)      | 1 (reference)         |
| ≥4,000                                                   | 1.45 (0.66-3.17)   | 1.40 (0.61-3.21)      |

\* p<0.05, \*\* p≤ 0.01, \*\*\*p≤0.001

<sup>a</sup> Others included minor ethnicities such as Tay, Thai, Muong, Nung, Khmer, and Mong.

<sup>b</sup> Higher education: Women who graduated from senior high school, vocational school, college, university, or had a postgraduate degree.

<sup>c</sup> Partner's age was divided by median.

<sup>d</sup> ANC: Antenatal care

<sup>e</sup> Other public sectors referred to local clinics, commune health centers, hospitals of a ministry or sector, and other public institutions.

<sup>§</sup> Private medical sectors were private hospitals or other private medical institutions.
